# Supplementary material for: Gene expression analysis of human induced pluripotent stem cell-derived neurons carrying copy number variants of chromosome 15q11-q13.1
Source: PubMed Central journal article supplement (PMC4332023; doi:10.1186/2040-2392-5-44), 2014-08-20

mat. int dup(15)

pat. int dup(15)

idic(15)  
(fibroblast)

idic(15)  
(cord blood)

genomic DNA

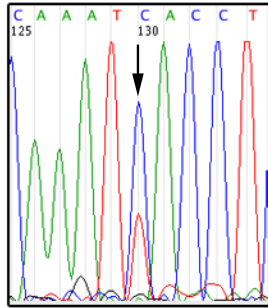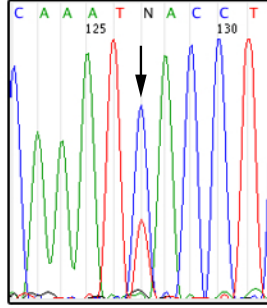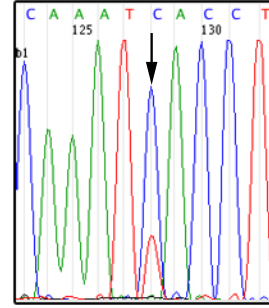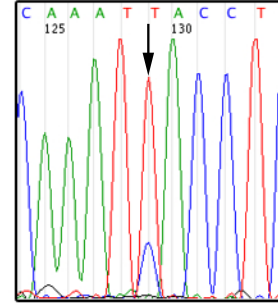

fibroblast cDNA

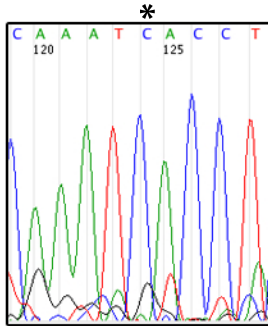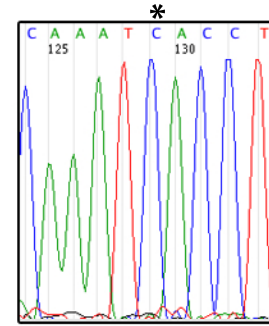

iPSC cDNA

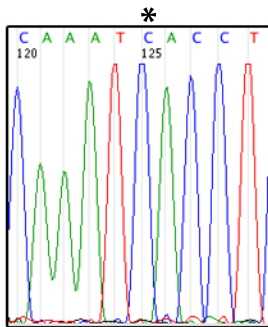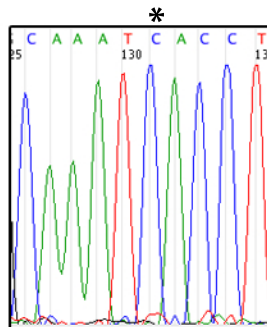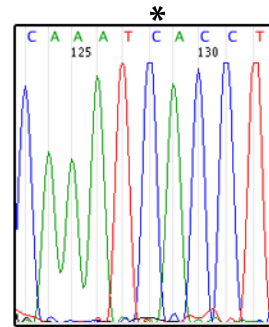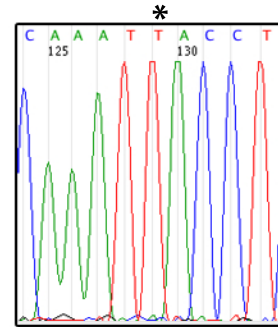

neuron cDNA

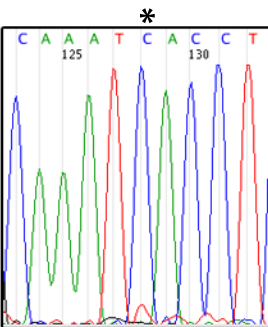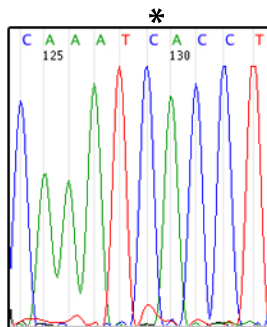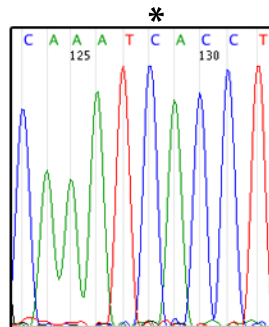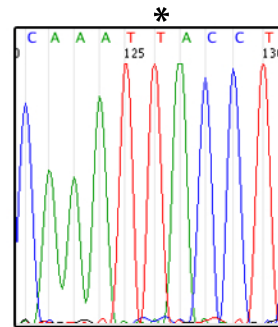

Supplement: 2040-2392-5-44-S4.pdf [file 2040-2392-5-44-S4.pdf]
