# Supplementary material for: Gene expression analysis of human induced pluripotent stem cell-derived neurons carrying copy number variants of chromosome 15q11-q13.1
Source: Mol Autism. 2014 Aug 20;5:44. doi: 10.1186/2040-2392-5-44 (PMC4332023; doi:10.1186/2040-2392-5-44)
Supplement: Additional file 3: Table S2 — Methylation analysis of Dup15q induced pluripotent stem cells (iPSCs) at the Prader-Willi syndrome imprinting center (PWS-IC) (individual iPSC clones). DNA methylation at the PWS-IC was assayed by methylation specific quantitative PCR (qPCR) using genomic DNA from Dup15q iPSCs. The calculated percent methylation for each clone within a genotype is presented from one assay per clone. *The mat. int dup(15)-12 clone, while originally identified as having a normal methylation status of 54%, subsequently demonstrated the 66% methylation status indicative of the maternal interstitial duplication containing clones, suggesting that this clone was mosaic for the duplication. ** The mat. int dup(15)-18 clone was also shown to be a mixed clone by DNA fluorescence in situ hybridization (FISH) analysis using a probe for SNRPN. [file 2040-2392-5-44-S3.xlsx]

## Sheet: Sheet1
Cell Line	%methylated at PWS-IC
mat. Int dup(15)
mat. Int dup(15)-02	0.6512
mat. Int dup(15)-06	0.6611
mat. Int dup(15)-07	0.6679
mat. Int dup(15)-10	0.6736
mat. Int dup(15)-11	0.6768
mat. Int dup(15)-13	0.6635
*mat. Int dup(15)-12	0.5408
**mat. Int dup(15)-18	0.5737
pat. Int dup(15)
pat. Int dup(15)-01	0.239461
pat. Int dup(15)-03	0.26481
pat. Int dup(15)-04	0.266539
pat. Int dup(15)-05	0.241473
Idic
Idic1-1	0.730356
Idic1-2	0.820589
Idic1-3	0.828946
Idic1-5	0.79041
Idic1-6	0.731779
Idic1-8	0.714053
IdicCB
IdicCB-03	0.7613
IdicCB-05	0.7873
IdicCB-07	0.8139
IdicCB-09	0.7316
